# Supplementary material for: Facile preparation of a MXene–graphene oxide membrane and its voltage-gated ion transport behavior
Source: Royal Society of Chemistry journal article supplement (doi:10.1039/d2cp03867f), 2022-01-01
Supplement: d2cp03867f1.pdf [file d2cp03867f1.pdf]

## Supplementary Information

### Facile preparation of a MXene-graphene oxide membrane and its voltage-gated ion transport behavior

Huifang Ouyang,<sup>a, b</sup> Xufeng Hong,<sup>a, c</sup> Zhiyuan Zhou,<sup>a</sup> Peng Xu,<sup>a</sup> Hui Tang,<sup>d</sup> Zeyu Ma,<sup>b</sup> Zhuqing Wang,<sup>b</sup> Xiaoqiao Liao,<sup>b</sup> Liang He\*,<sup>b, e</sup>

*a. State Key Laboratory of Advanced Technology for Materials Synthesis and Processing, Wuhan University of Technology, Wuhan 430070, P. R. China*

*b. School of Mechanical Engineering, Sichuan University, Chengdu 610065, P. R. China*

*c. School of Materials Science and Engineering, Peking University, Beijing 100871, P. R. China*

*d. School of Materials and Energy, University of Electronic Science and Technology of China, Chengdu 611731, P. R. China*

*e. Med+X Center for Manufacturing, West China Hospital, Sichuan University, Chengdu 610041, P. R. China*

E-mail: [hel20@scu.edu.cn](mailto:hel20@scu.edu.cn)

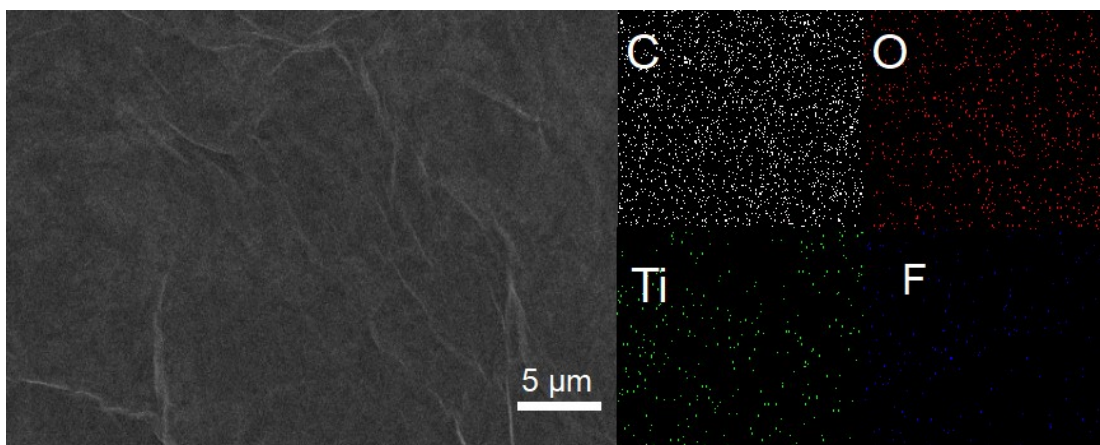

**Fig. S1** SEM image of the **MGO-7** and its EDS elemental mapping.

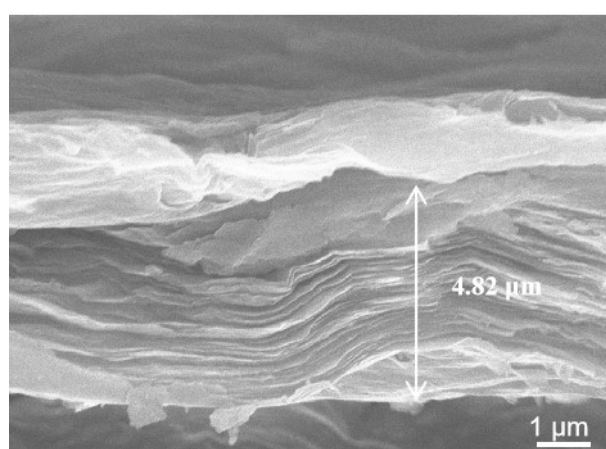

**Fig. S2** Cross-section SEM image of the **MGO-7**.

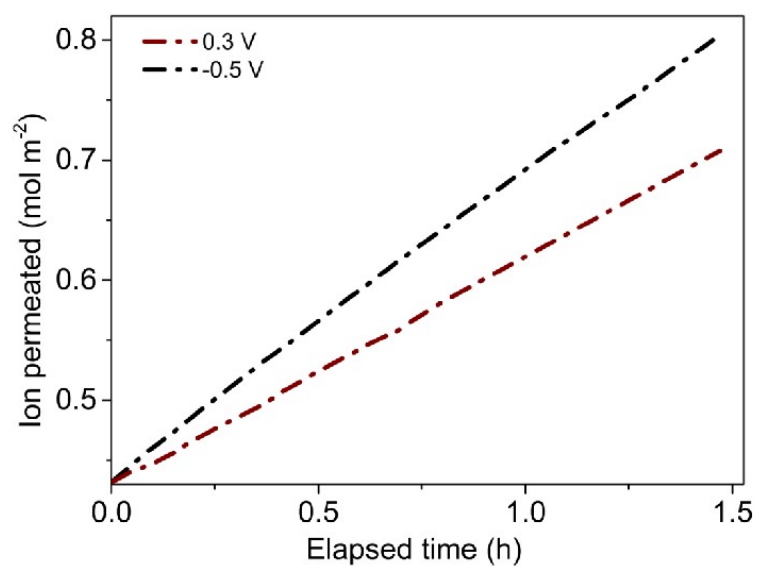

**Fig. S3** The steady-state diffusion curves obtained under  $V_g$  of -0.5 and +0.3 V at MXene: GO = 7: 3.

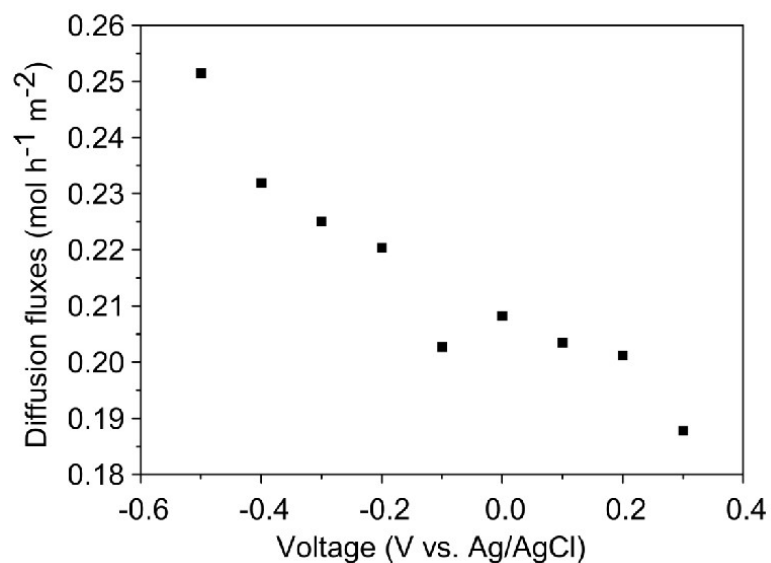

**Fig. S4** Molar conductivity of MGO-7 at different potentials.

It can be observed that when  $V_g$  are -0.5, -0.4, -0.3, -0.2, -0.1, 0, 0.1, 0.2 and 0.3 V, the diffusion fluxes are 0.251, 0.232, 0.225, 0.220, 0.203, 0.208, 0.233, 0.211 and 0.188 mol h<sup>-1</sup> m<sup>-2</sup>, respectively.

**Table. S1** The charge transfer resistance ( $R_{ct}$ ) and ohmic resistance ( $R_e$ ) of **MGOm** at different modulation ratios.

| MXene: GO             | 8: 2  | 7: 3  | 6: 4  | 5: 5   | 4: 6   | 10: 0 |
|-----------------------|-------|-------|-------|--------|--------|-------|
| $R_{ct}$ ( $\Omega$ ) | 3.45  | 1.10  | 4.32  | 4.87   | 5.49   | 2.90  |
| $R_e$ ( $\Omega$ )    | 48.88 | 70.72 | 82.52 | 152.20 | 160.90 | 46.64 |

The smaller the ohmic resistance ( $R_e$ ), the higher the electrical conductivity. The smaller the charge transfer resistance ( $R_{ct}$ ), the higher the charge transport rate, and the steeper the straight line at the low-frequency region indicates the higher ion diffusion rate.

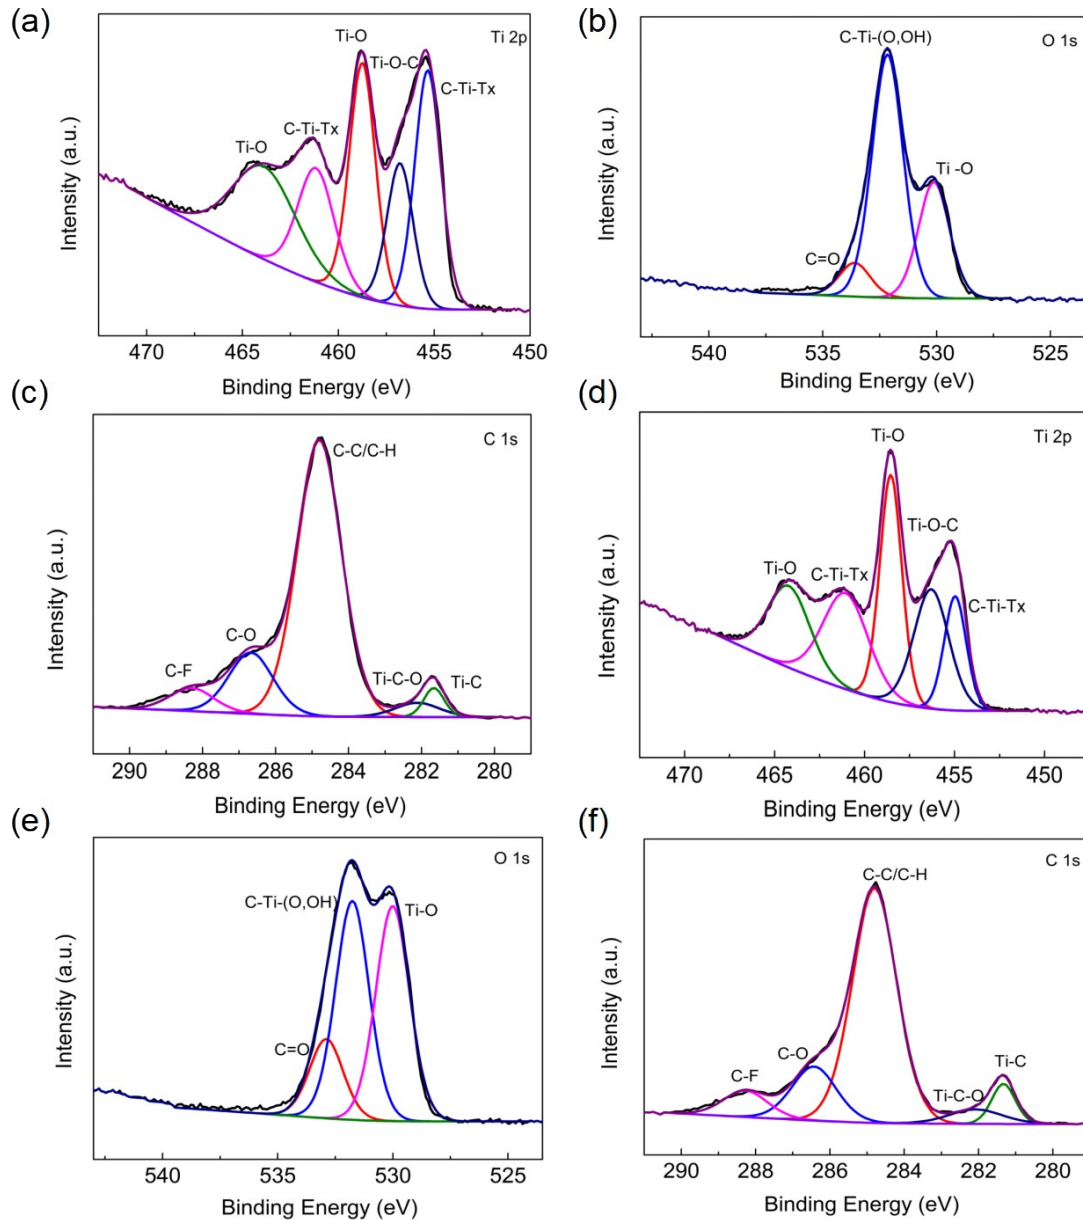

**Fig. S5** XPS spectra of MXene phases in MGO-7 near the salt concentration side of pristine membranes (a-c) and the samples after test (d-f).

It can be concluded that no changes in the number and displacement of peaks occur, indicating that no new phases are generated before and after the test.
